# Supplementary material for: Immunomolecular Assay Based on Selective Virion Capture by Spike Antibody and Viral Nucleic Acid Amplification for Detecting Intact SARS-CoV-2 Particles
Source: Research Square preprint supplement (doi:10.21203/rs.3.rs-1374603/v1), 2022-02-22

**Supplementary Figure 1:** Plasmid profiles for lentivirus-transformed plasmid, pLV-SARS-CoV-2**-**F1abFabNE-GFP, and envelope plasmid, pCMV3-2019-nCoV-Spike

(S1+S2).


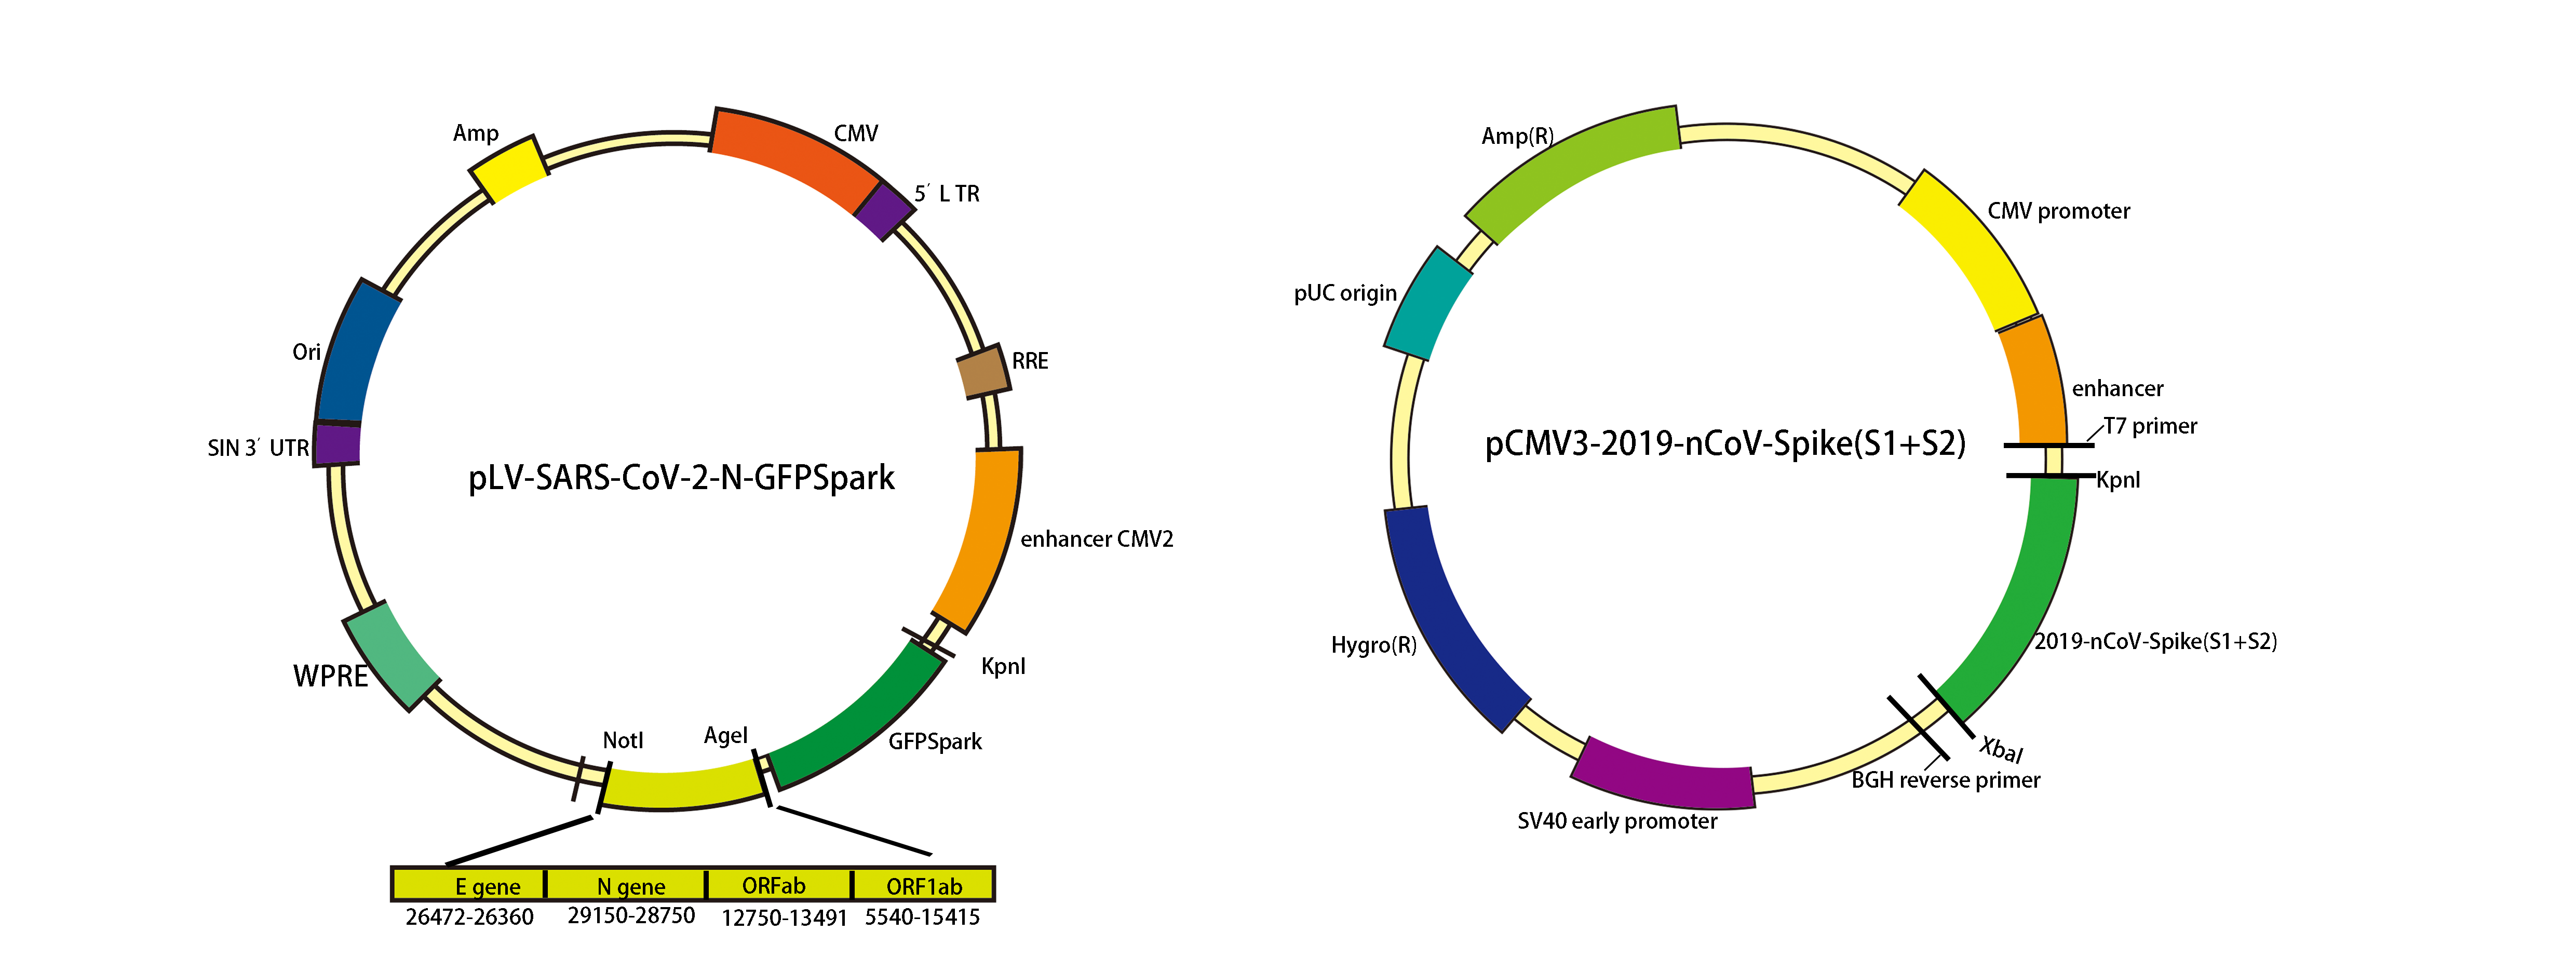


**Supplementary Figure 2:** Principle of Lentivirus packaging.


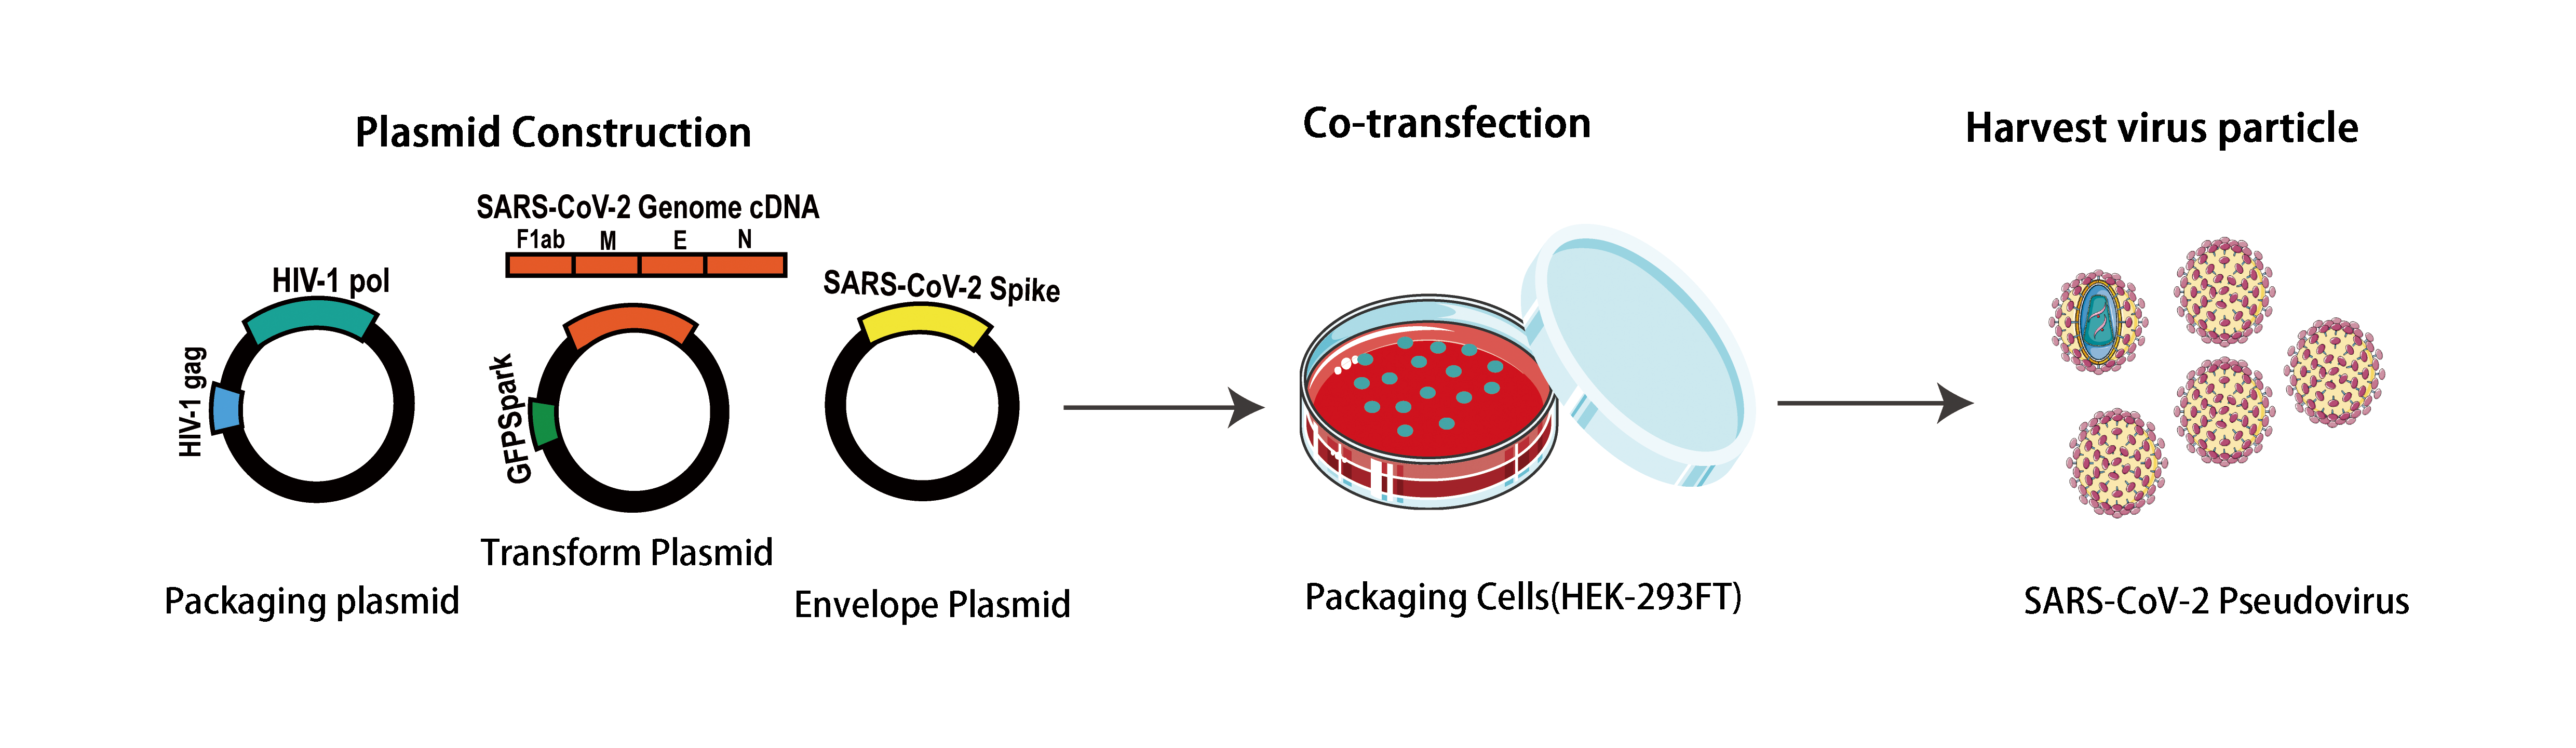


**Supplementary Figure 3:** Optimized detection conditions


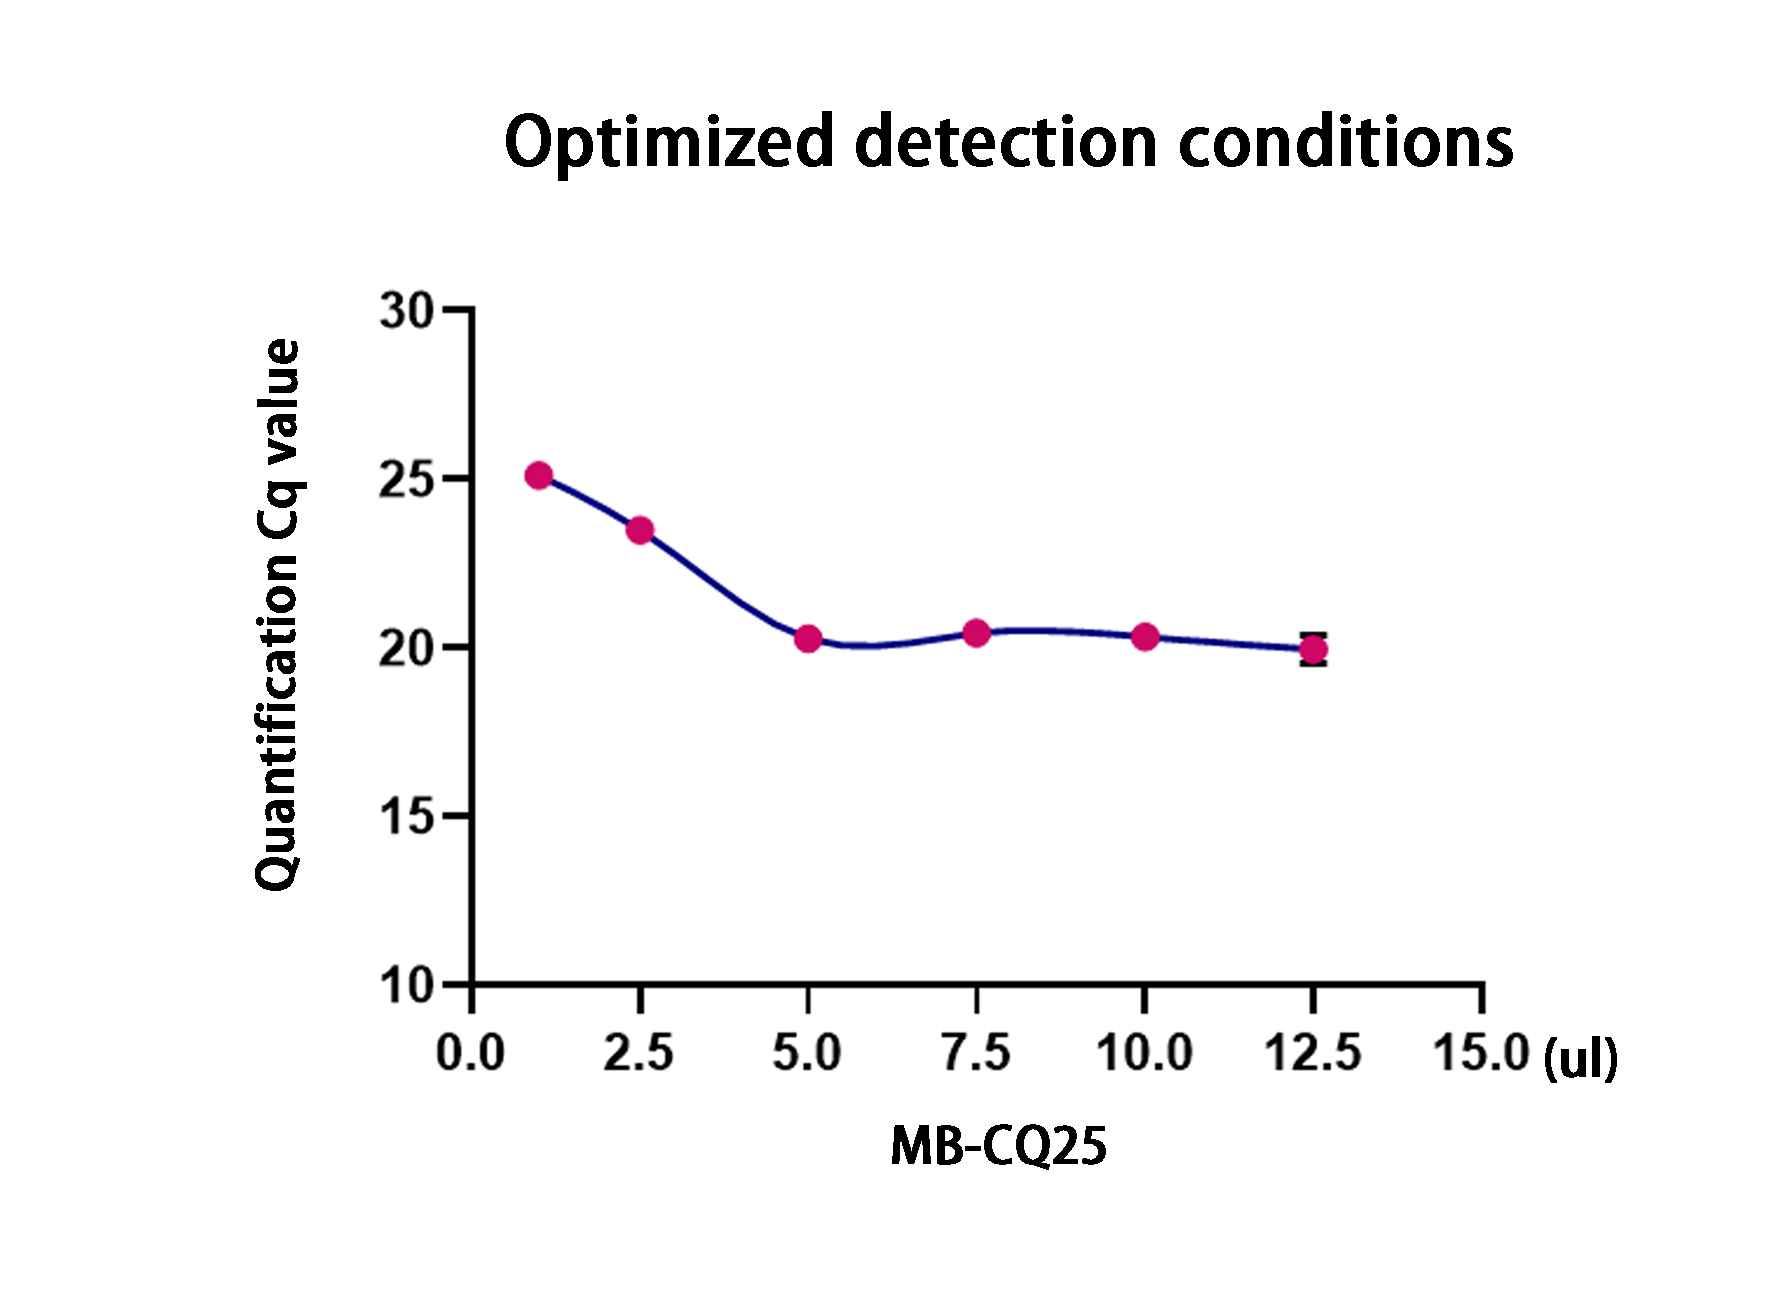


**Supplementary Figure 4:** The SARS-CoV-2 pseudovirus stability with respect to time and temperature.


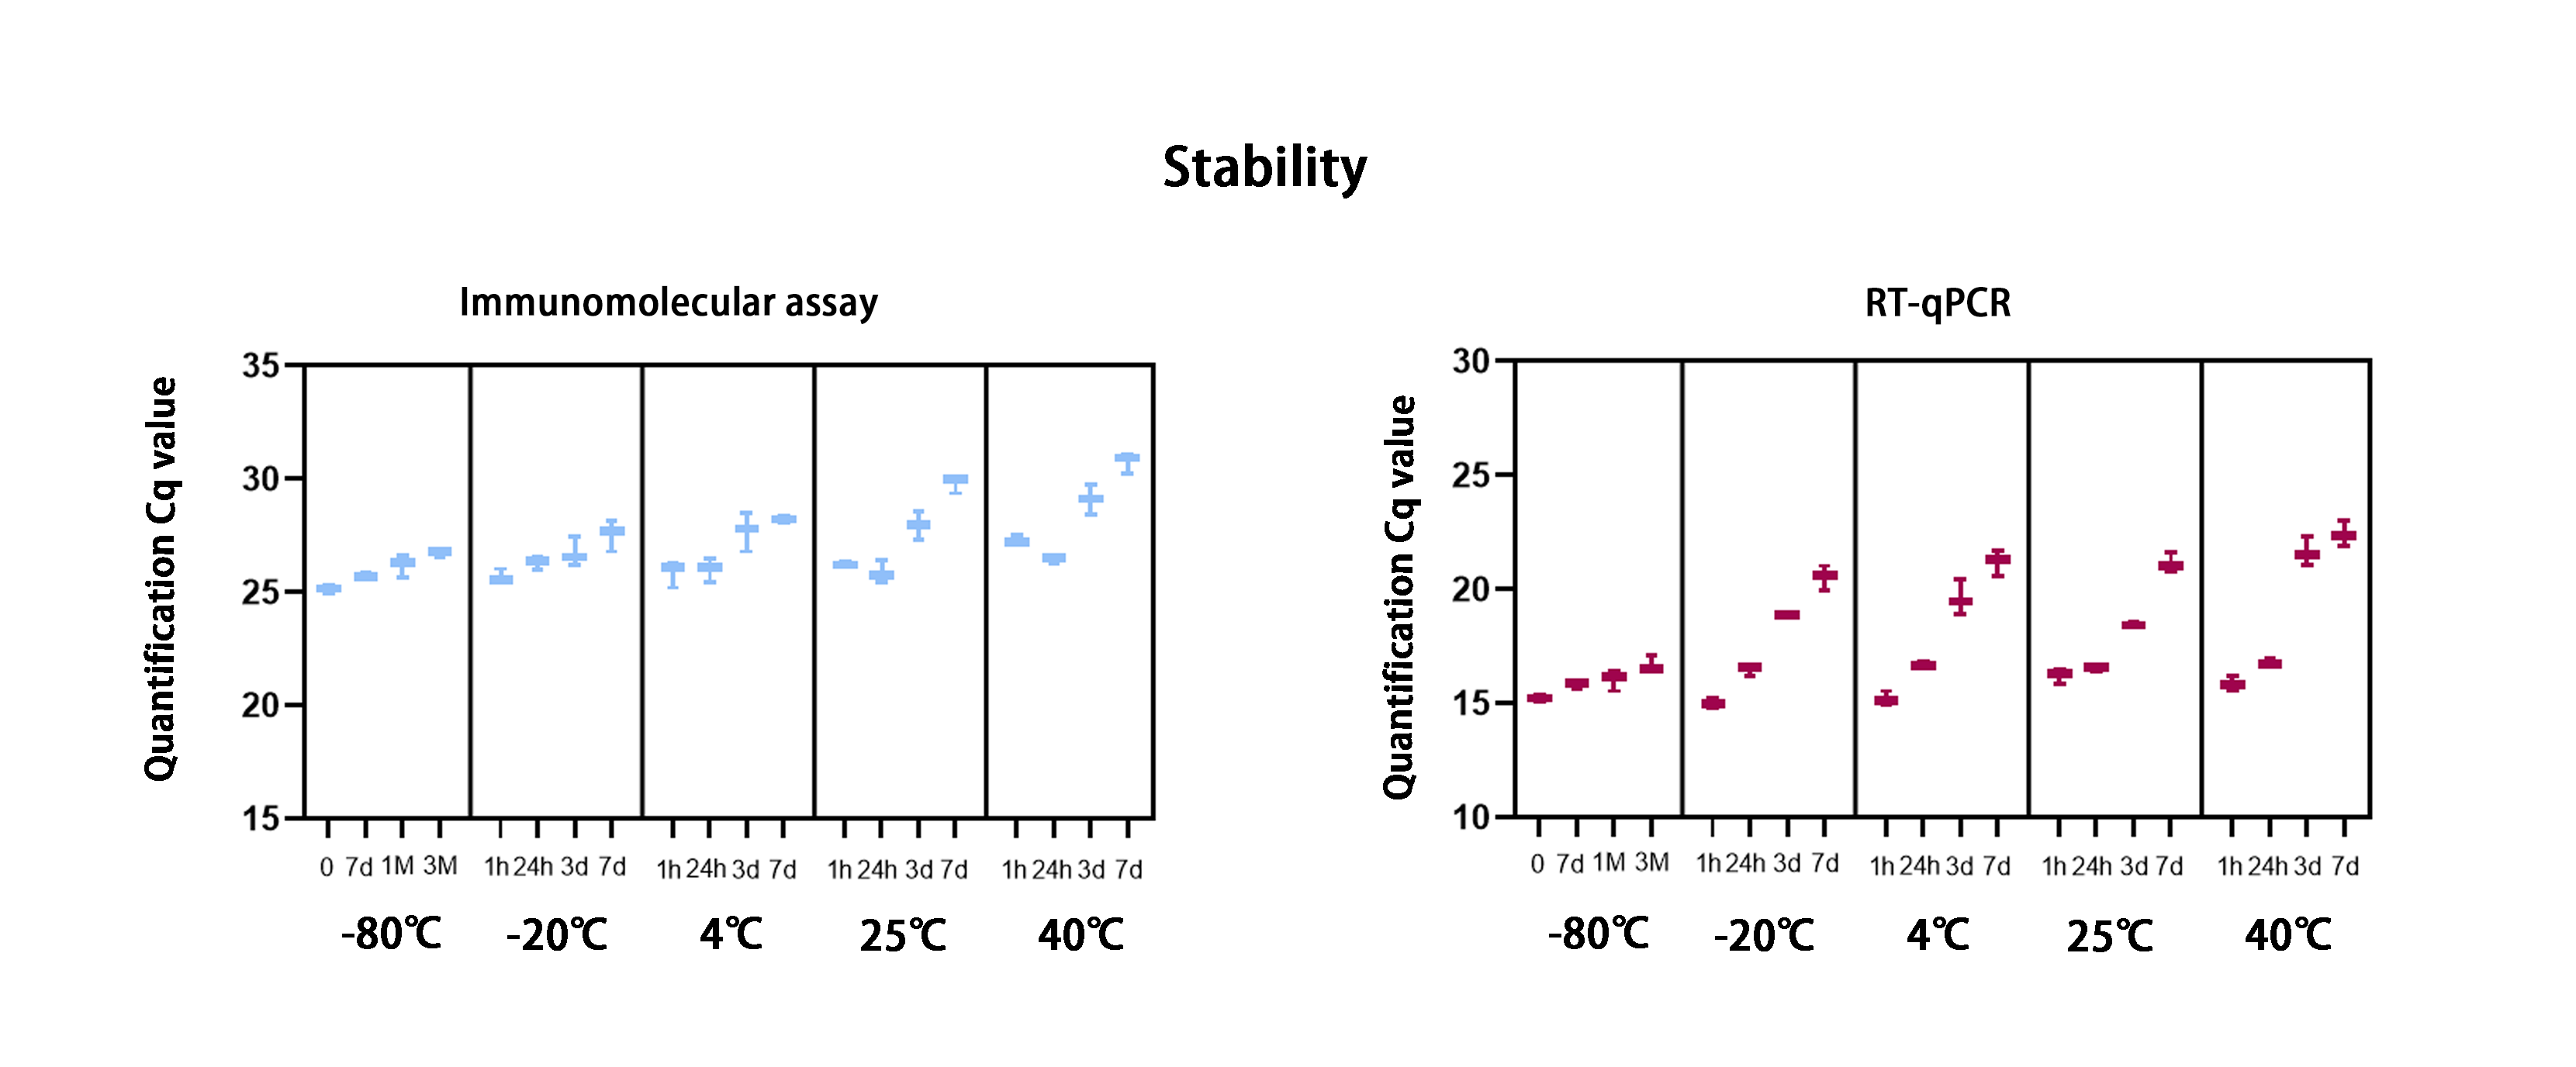

Supplement: Supplementary file 2 [file 8d36dbc64478c6bce1f4f626.docx]
